# Supplementary material for: Investigating the Gut Microbiota Composition of Individuals with Attention-Deficit/Hyperactivity Disorder and Association with Symptoms
Source: PubMed Central journal article supplement (PMC7143990; doi:10.3390/microorganisms8030406), 2020-03-13
Supplement: microorganisms-08-00406-s001.pdf [file microorganisms-08-00406-s001.pdf]

## Supplemental Results:

### *Results of 16S rRNA analysis after the filtering procedure of taxonomic data*

One sample was removed after NG-Tax pipeline, because of its low number of final total reads. The NG-Tax sequencing results were represented by a total of 1 700 925 reads corresponding to 2 186 OTUs which represented 176 genera (Figure S1). After filtering, the taxonomic data was represented by 1 659 853 reads corresponding to 1 965 OTUs within 77 genera. Removed genera (56.25%) were represented by 2.4% of the total reads and 0.18% of total relative abundance. One sample was removed due to having less than 10% of the total observed genera.

### *Sequencing depth comparison*

After filtering of the taxonomic data, the total reads were compared between the groups. This comparison showed that the sequencing depth was evenly distributed among all groups; ADHD (mean  $\text{rank}_{\text{ADHD}}=52.51$ ; Median<sub>ADHD</sub>=12 888), controls (mean  $\text{rank}_{\text{controls}}=51.81$ ; Median<sub>controls</sub>=13 189) and subthreshold ADHD (mean  $\text{rank}_{\text{subthreshold}}=51.20$ ; Median<sub>subthreshold</sub>=10 503; H=0.25, P=0.988) (Table S1).

### *NCBI BLAST results*

The *Ruminococcaeae\_UCG\_004* genus was represented by two OTUs/sequences: OTU\_65143327 and OTU\_65143327 with the total reads of 1555 and 53 respectively. Since the *Ruminococcaeae\_UCG\_004* genus was mainly represented by OTU\_65143327, the sequences of this OTU were subjected to NCBI BLAST (<https://blast.ncbi.nlm.nih.gov>) to query for highly similar sequences (the blasted sequences can be found below this paragraph). BLAST indicated that *Ruminococcaeae\_UCG\_004* could be *Ektepia gabavorous* (Accession:

MH636586.1), which we confirmed by re-running the NG-Tax pipeline increasing the read length to 100bp (of each forward and reverse), and we revealed that our targeted sequence is in 100% similar to N=11 uncultured bacteria and one cultured bacteria - *Evtepia gabavorous* (Query Cover: 100%; E-value: 2e-43; Percent Identity: 100%). Moreover, all the uncultured bacteria align with the sequence of *E. gabavorous* (N=10/11 have Percent Identity of 99-100% and N=1/11 has Percent Identity of 94%). This is probably due to the fact that these sequences were deposited in the NCBI before *E. gabavorous* was isolated hence named uncultured.

Blasted sequences:

>OTU 65143327; g\_\_Ruminococcaceae\_UCG-004 ; Forward sequence

GATGAACGCTGGCGGCGTGCTTAACACATGCAAGTCGAACGGAGGACCCTTGACGGAGTTTTCGGA  
CAAC

GGATAGGAATCCTTAGTGGCGGACGGGTGA

>OTU 65143327; g\_\_Ruminococcaceae\_UCG-004 ; Reverse sequence

CTGGGCCGTGTCTCAGTCCCAATGTGGCCGGTCAACCTCTCAGTCCGGCTACTGATCGTCGCCTTGGT  
AG

**Supplemental Tables and Figures**

**Figure S1.** Filtering procedure applied in our study.

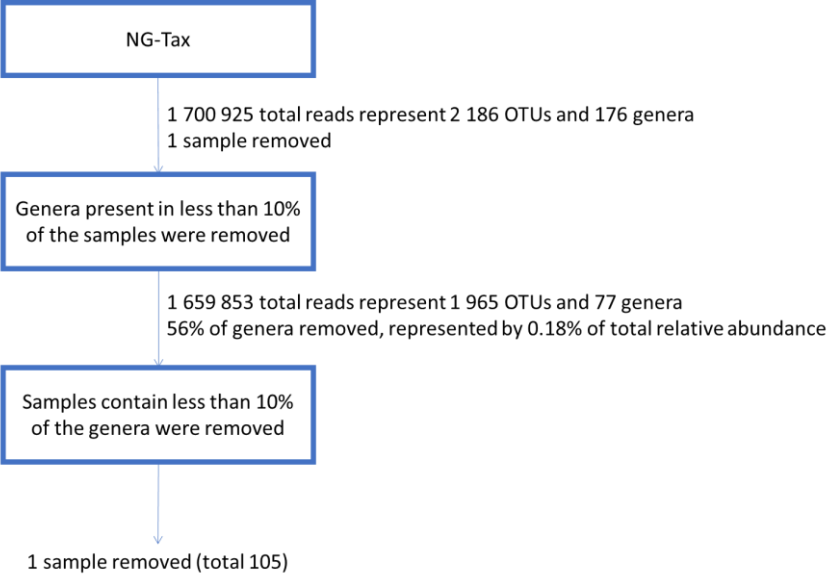

**Figure S2.** Alpha diversity comparison of the gut microbiome between participants with ADHD and controls. Alpha diversity was indicated by observed OTUs (P=0.08), Shannon index (P=0.16) and Phylogenetic diversity (P=0.15). Box plots represent median with whiskers on  $\pm 1.5$  IQR.

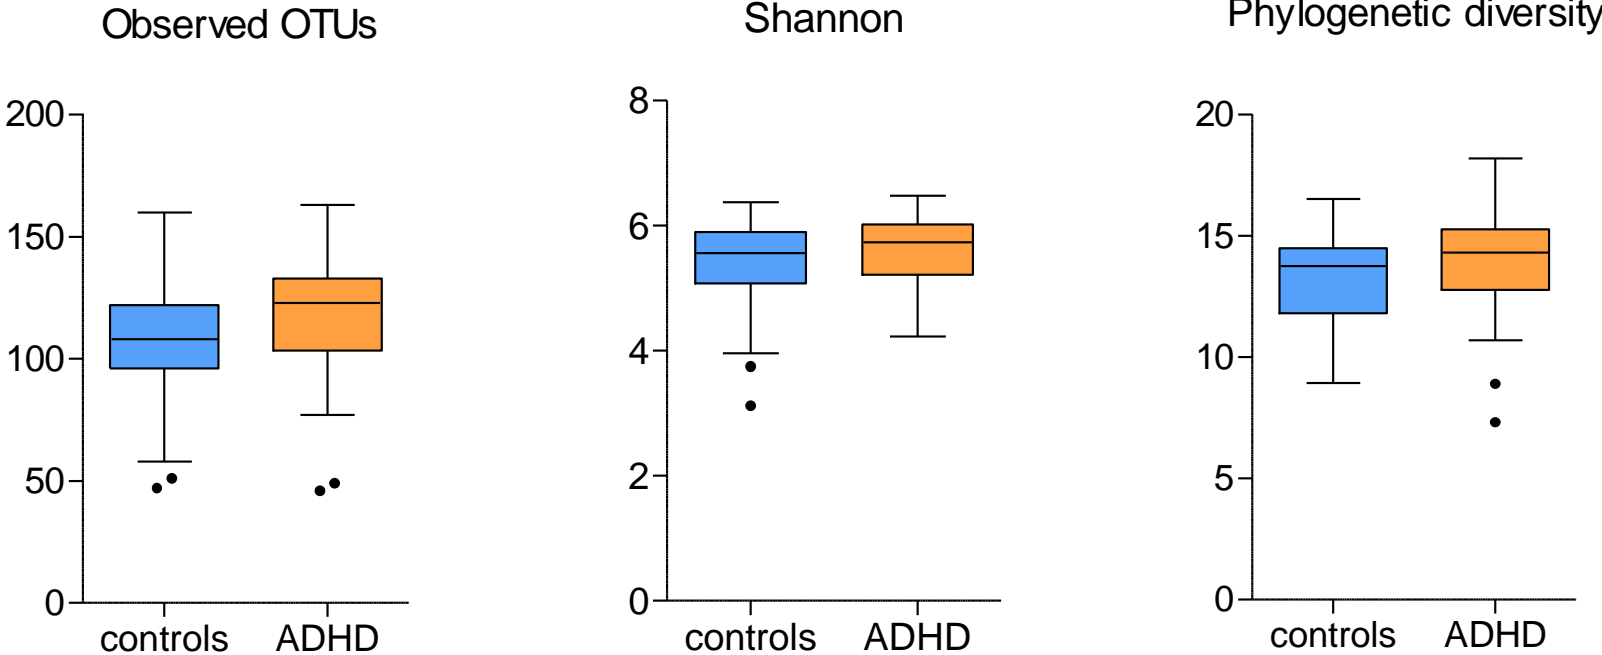

**Figure S3.** Principal coordinates analysis (PCoA) of weighted UniFrac distances representing microbial composition of participants with ADHD and controls. The first two components are plotted with the percentage of the variance explained by each principal component. Each point represents an individual sample.

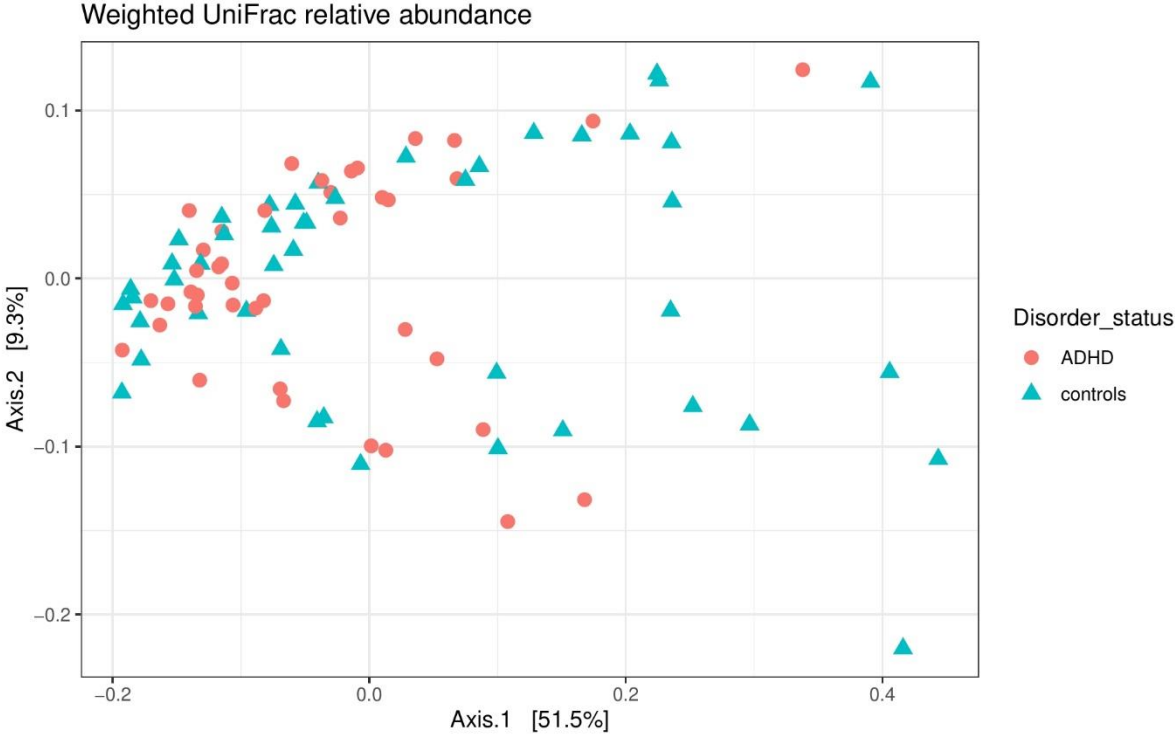

**Figure S4.** Distribution of the selected genera for behavioral analysis for each group (ADHD samples on the left and controls on the right). Barplots of *Clostridiales\_g\_\_* (A), *Family\_XIII\_AD3011\_group* (B), *Ruminococcaceae\_UCG\_005* (C), *Ruminococcus\_2* (D), *Ruminococcaceae\_g\_\_* (E), *Ruminococcaceae\_NK4A214\_group* (F) and *Ruminococcaceae\_UCG\_004* (G). Each bar represents the sum to 1 of the taxa relative abundance for an individual sample; straight line represents mean and dotted line represents median.

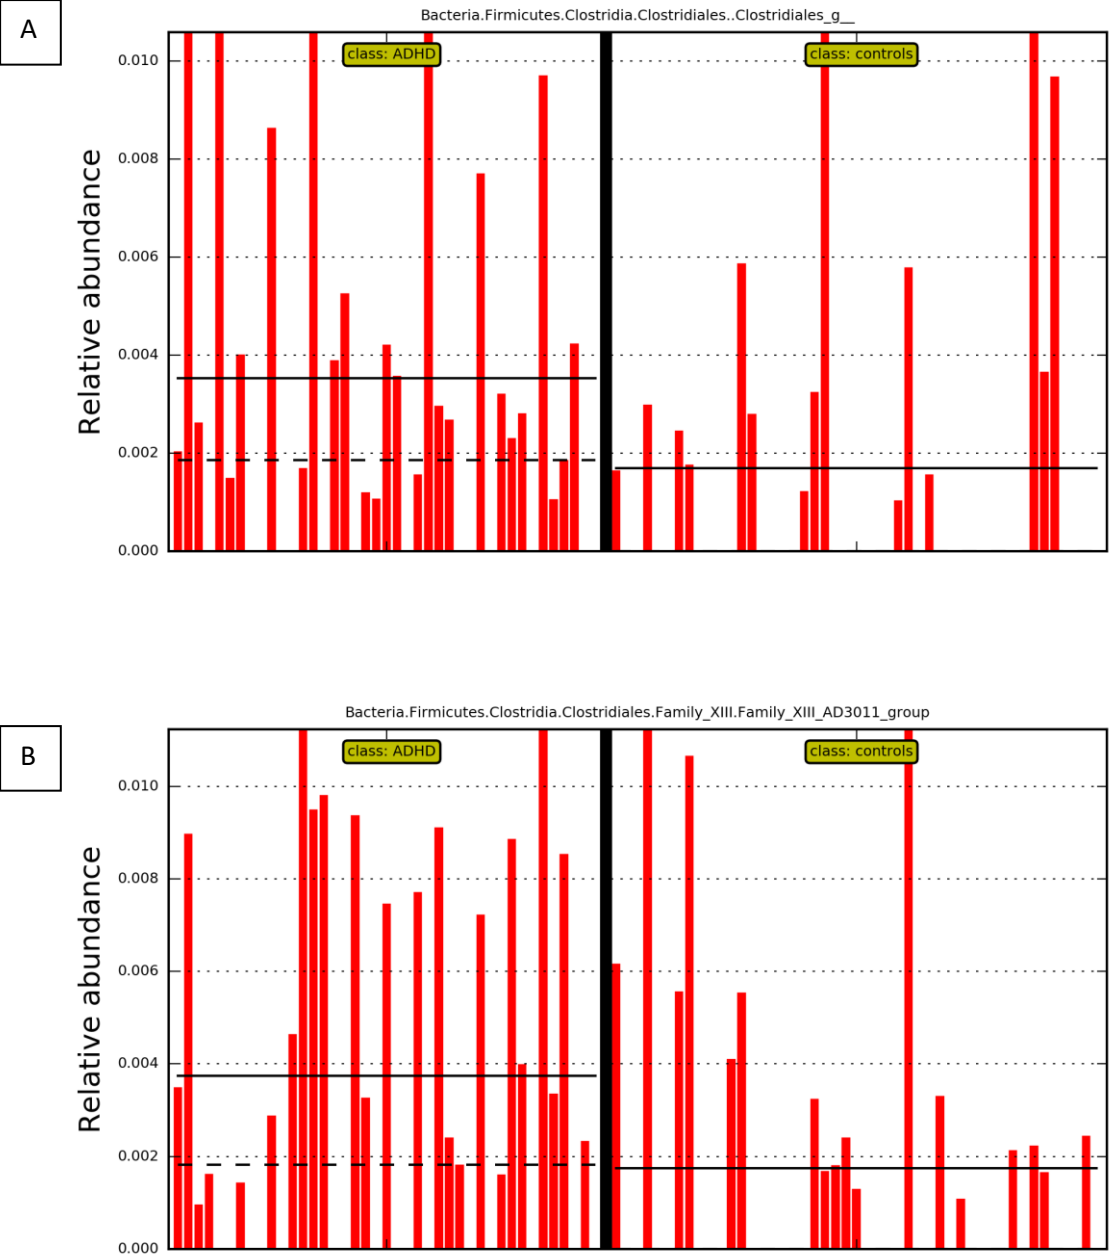

C

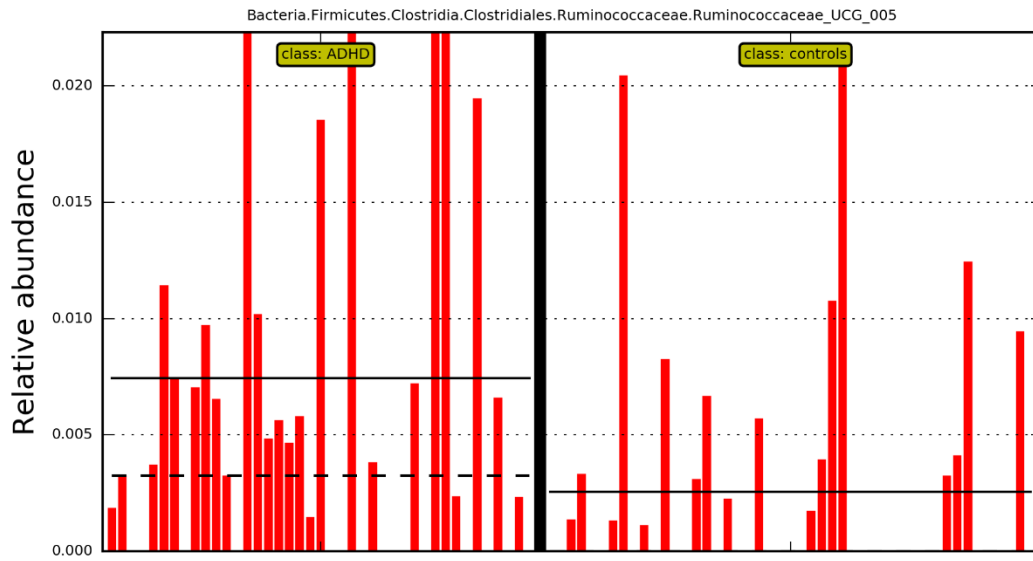

D

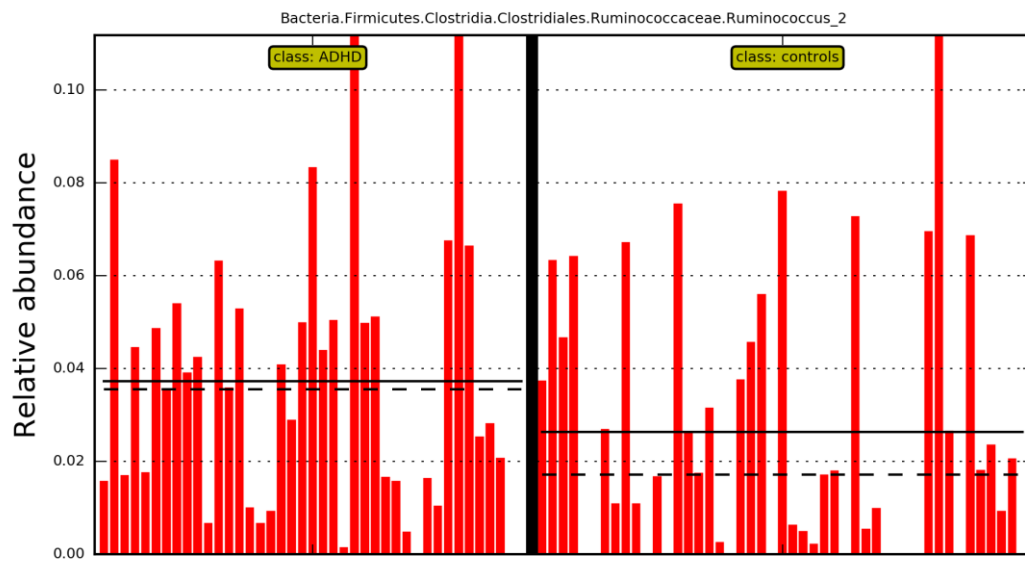

E

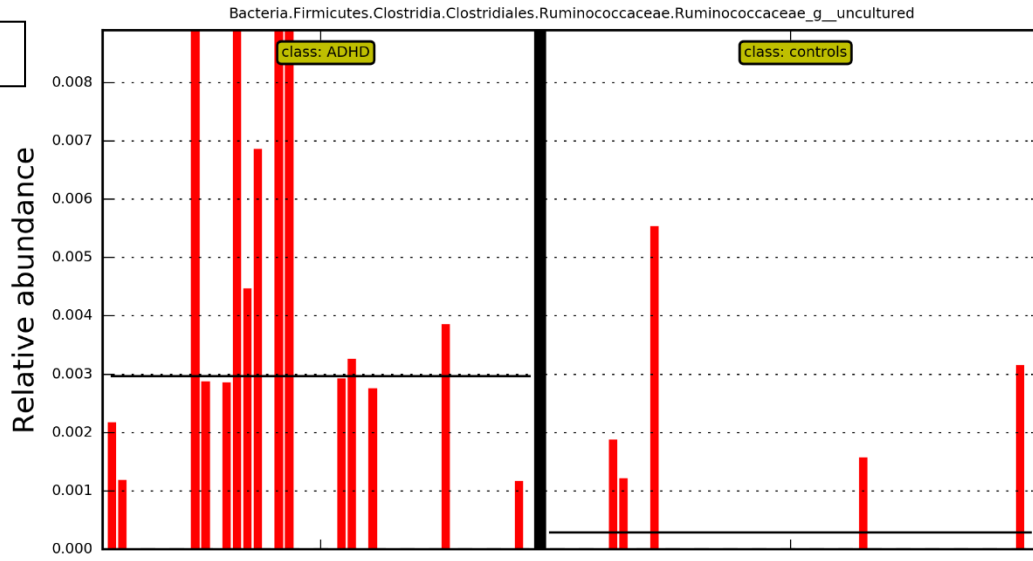

F

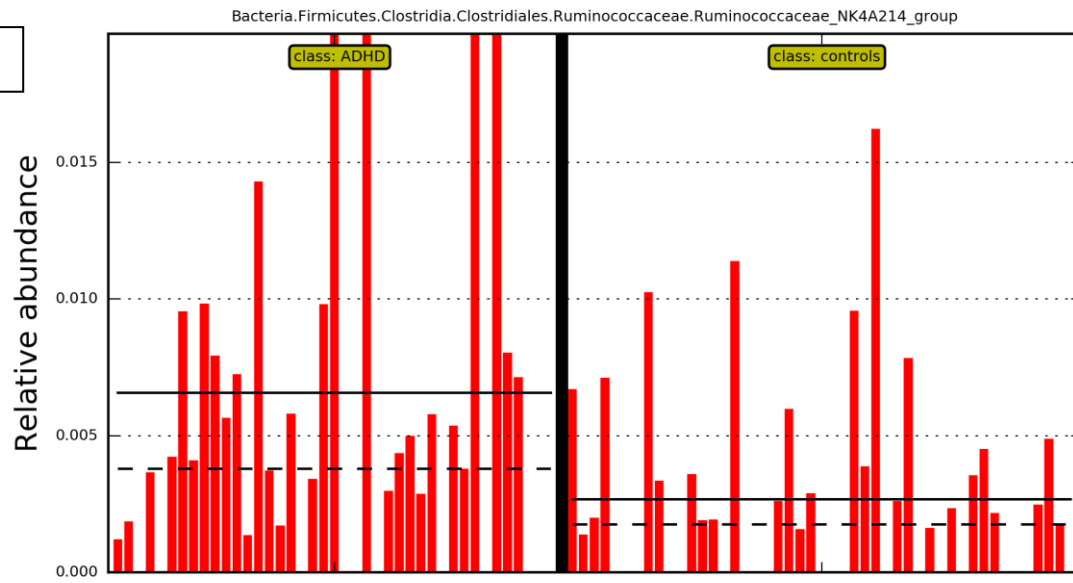





**Figure S5.** Distribution of the non-selected genera for behavioral analysis for each group (ADHD samples on the left and controls on the right). Barplots of *Ruminiclostridium\_9* (A), *Haemophilus* (B) and *Ruminococcaceae\_UCG-003* (C). Each bar represents the sum to 1 of the taxa relative abundance for an individual sample; straight line represents mean and dotted line represents median.

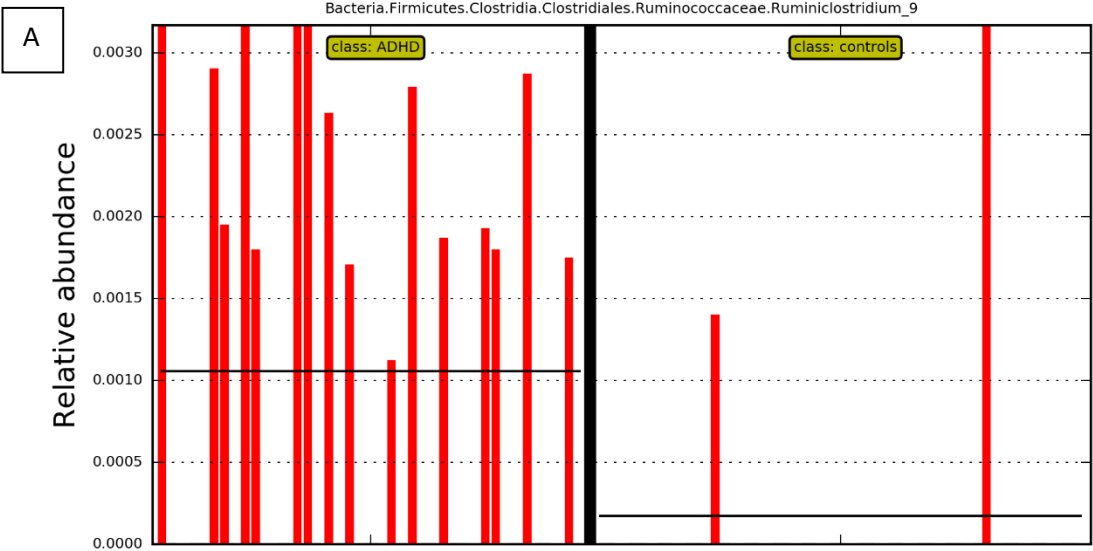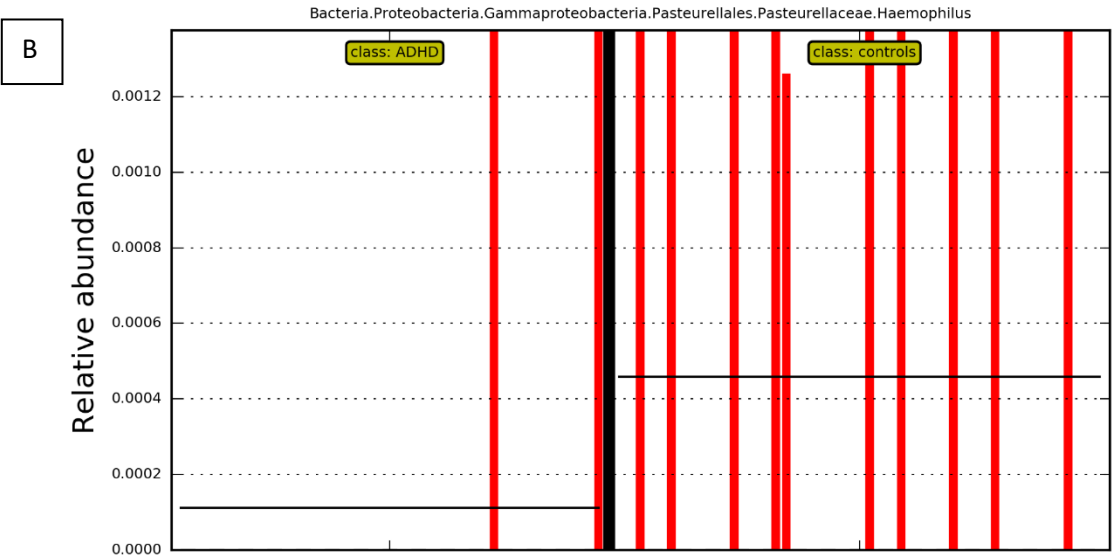

C

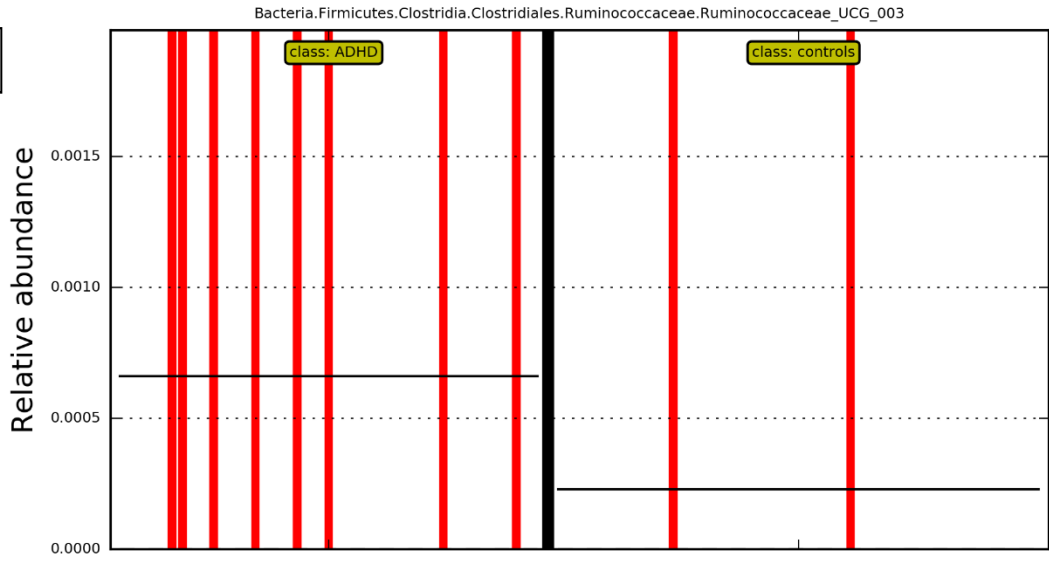

**Figure S6.** Boxplot of two genera relative abundance being different between medicated and non-medicated participants with ADHD. Box plots represent median with whiskers on  $\pm 1.5$  IQR.

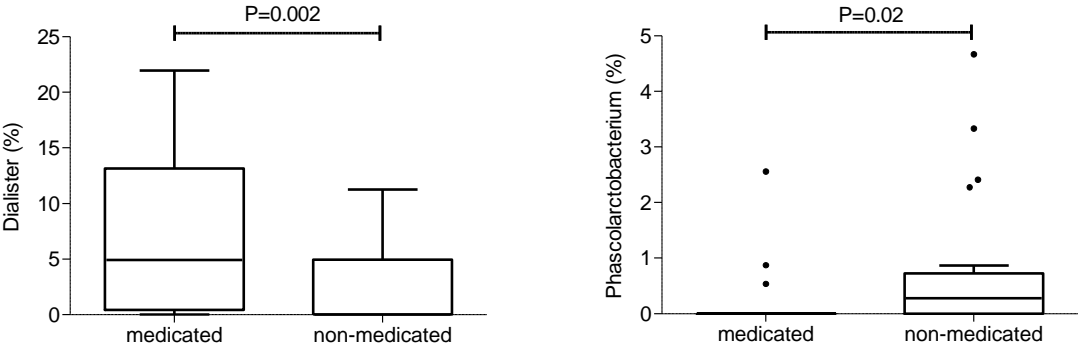

**Figure S7.** Spearman's rank correlation matrix of the selected bacterial taxa. The selection of the genera was done prior to correlation analysis and it was done based on their prevalence (see the method section). The matrix represents only nominal significant ( $P < 0.05$ ) correlations.

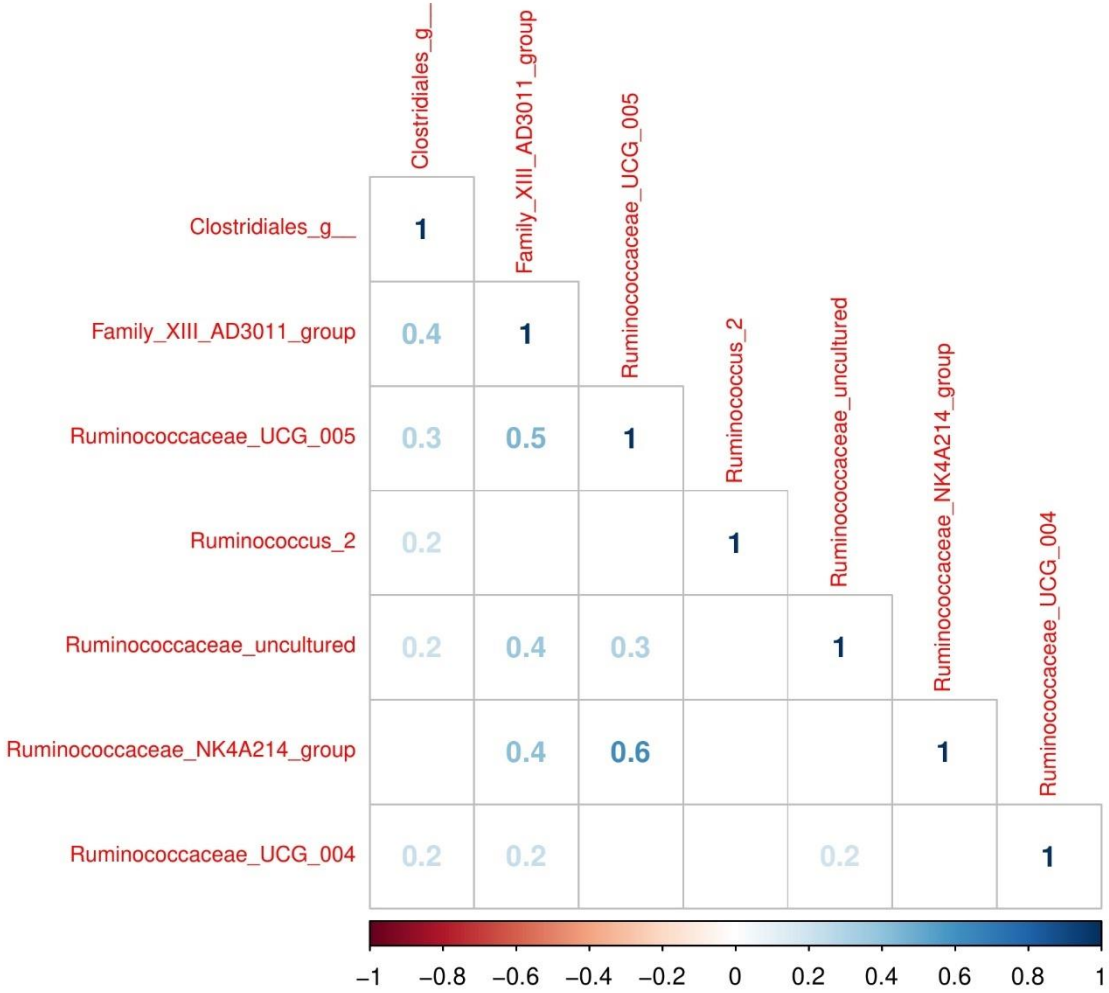

**Table S1.** Total number of reads of participants with ADHD, controls and subthreshold ADHD.

|                   | Total number of reads |                      |                        |                      |
|-------------------|-----------------------|----------------------|------------------------|----------------------|
|                   | N                     | Median (IQR)         | Mean rank <sup>a</sup> | P-value <sup>a</sup> |
| ADHD              | 41                    | 12888 (6041 – 21569) | 52.51                  |                      |
| controls          | 47                    | 13819 (7605 – 21413) | 51.81                  | .988                 |
| subthreshold ADHD | 15                    | 10503 (6280 -21290)  | 51.20                  |                      |

<sup>a</sup> calculated based on the Kruskal-Wallis Test

**Table S2.** Relative abundance of bacterial phyla of all participants in our study.

| Phylum's relative abundance and FBR |                       |                                |                          |                                    |                       |
|-------------------------------------|-----------------------|--------------------------------|--------------------------|------------------------------------|-----------------------|
|                                     | ADHD<br>median (IQR)  | ADHD<br>Mean rank <sup>a</sup> | controls<br>median (IQR) | controls<br>Mean rank <sup>a</sup> | P-values <sup>a</sup> |
| <i>Firmicutes</i>                   | 77.25 (71.63 – 87.06) | 49.63                          | 78.85 (52.19 – 83.04)    | 40.02                              | 0.078                 |
| <i>Bacteroidetes</i>                | 16.91 (8.56 – 25.63)  | 40.37                          | 18.21 (10.93 – 47.49)    | 48.11                              | 0.156                 |
| <i>Actinobacteria</i>               | 0.83 (.25 – 2.35)     | 45.98                          | 0.71 (0.12 – 2.61)       | 43.21                              | 0.612                 |
| <i>Proteobacteria</i>               | 0.14 (0 – 0.64)       | 46.06                          | 0.18 (0 – .43)           | 43.14                              | 0.579                 |
| <i>Verrucomicrobia</i>              | 0.11 (0 – 0.33)       | 44.26                          | 0.11 (0 – .51)           | 44.71                              | 0.929                 |
| FBR                                 | 4.61 (2.84 – 9.78)    | 47.70                          | 4.44 (1.10 – 7.89)       | 40.85                              | 0.208                 |

N=88; <sup>a</sup> calculated based on the Mann-Whitney U test; FBR = *Firmicutes* to *Bacteroidetes* ratio; IQR = interquartile range

**Table S3.** Multiple regression model with the selected genera on inattention.

|                                      | Inattention     |                 |         | Results taken from Table3 <sup>b</sup> |         |
|--------------------------------------|-----------------|-----------------|---------|----------------------------------------|---------|
|                                      | B (S.E.)        | 95% CI          | P-value | B (S.E.)                               | P-value |
| <i>Clostridiales_g__</i>             | -4.312 (3.571)  | -11.143 - 3.037 | 0.231   | -1.467 (3.077)                         | 0.634   |
| <i>Family_XIII_AD3011_group</i>      | -0.269 (4.663)  | -8.888 – 8.423  | 0.954   | 5.323 (2.779)                          | 0.059   |
| <i>Ruminococcaceae_UCG_005</i>       | -1.509 (3.053)  | -7.363 - 4.205  | 0.622   | 1.495 (1.647)                          | 0.367   |
| <i>Ruminococcus_2</i>                | 1.525 (0.454)   | 0.675 - 2.362   | 0.001   | 1.098 (0.445)                          | 0.016   |
| <i>Ruminococcaceae_g__uncultured</i> | 6.081 (6.305)   | -5.601 - 18.013 | 0.338   | 12.241 (5.011)                         | 0.017   |
| <i>Ruminococcaceae_NK4A214_group</i> | 4.279 (2.651)   | -0.805 - 9.481  | 0.111   | 3.392 (1.860)                          | 0.072   |
| <i>Ruminococcaceae_UCG_004</i>       | 43.920 (13.348) | 19.372 - 69.095 | 0.001   | 39.291 (12.296)                        | 0.002   |

The model includes all selected genera in one model; The identified outliers were removed from this analysis, N=89; The model was adjusted for age, sex, BMI, diff\_days and a random factor for family relatedness; <sup>b</sup> Results from simple regression models (taken from Table 3 for the purpose of easier comparison).
